# Supplementary material for: Histological Chorioamnionitis Induces Differential Gene Expression in Human Cord Blood Mononuclear Leukocytes from Term Neonates
Source: PubMed Central journal article supplement (PMC6458165; doi:10.1038/s41598-019-42205-x), 2019-04-10
Supplement: 41598_2019_42205_MOESM1_ESM.pdf [file 41598_2019_42205_MOESM1_ESM.pdf]

**Histological Chorioamnionitis Induces Differential Gene Expression in Human Cord  
Blood Mononuclear Leukocytes from Term Neonates**

Suhita Gayen nee' Betal<sup>1</sup>, Swati Murthy<sup>1</sup>, Michael Favara<sup>1</sup>, Gina Fong<sup>1</sup>, Joanna SY Chan<sup>2</sup>,  
Sankar Addya<sup>3</sup>, Thomas H Shaffer<sup>1</sup>, Jay Greenspan<sup>1</sup>, Vineet Bhandari<sup>4</sup>, Irfan Rahman<sup>5</sup>, Zubair

H. Aghai<sup>1\*</sup>

<sup>1</sup>Neonatology, Thomas Jefferson University/Nemours, Philadelphia, PA, USA

<sup>2</sup>Department of Pathology, Thomas Jefferson University, Philadelphia, PA

<sup>3</sup>Laboratory of Cancer Genomics, Thomas Jefferson University, Philadelphia, PA

<sup>4</sup>Section of Neonatology, Department of Pediatrics, St. Christopher's Hospital for Children,  
Drexel University College of Medicine, Philadelphia, PA, USA.

<sup>5</sup>Department of Environmental Medicine, University of Rochester Medical Center, Rochester,  
NY, United States.

\*Corresponding author:

Zubair H Aghai, MD

Professor of Pediatrics

Thomas Jefferson University

Nemours at TJU

Philadelphia, PA, USA

zaghai@nemours.org

**Table 1: Differentially upregulated probeID or genes after exposure to histological chorioamionitis:**

| ProbeID                   | Gene Symbol                    | CHORIO Group Average Expression | Control Group Average Expression | Fold Change | P-value  |
|---------------------------|--------------------------------|---------------------------------|----------------------------------|-------------|----------|
| TC17001604.hg.1           | <b>LRRC37A4P</b>               | 1389.16                         | 344.89                           | <b>4.01</b> | 0.0245   |
| TC04002938.hg.1           | <b>LOC285505</b>               | 364.56                          | 136.24                           | <b>2.68</b> | 0.012    |
| TC07000288.hg.1           | <b>LINC01061</b>               | 1652.00                         | 643.59                           | <b>2.58</b> | 0.0117   |
| TC03000255.hg.1           | <b>CCR2</b>                    | 765.36                          | 304.44                           | <b>2.51</b> | 0.0417   |
| TC04001682.hg.1           | <b>FAM198B</b>                 | 643.59                          | 256.00                           | <b>2.5</b>  | 0.0167   |
| TC17000604.hg.1           | <b>LRRC37A2</b>                | 13216.02                        | 5556.65                          | <b>2.37</b> | 0.0312   |
| TC07001299.hg.1           | <b>TRGV4</b>                   | 140.07                          | 60.13                            | <b>2.32</b> | 0.0002   |
| TC07001300.hg.1           | <b>TRGV3</b>                   | 179.77                          | 79.89                            | <b>2.24</b> | 4.50E-05 |
| TC04002939.hg.1           | <b>TMEM144</b>                 | 240.52                          | 112.99                           | <b>2.12</b> | 0.0173   |
| TC17001603.hg.1           | <b>LRRC37A4P;<br/>LRRC37A2</b> | 20594.91                        | 9946.68                          | <b>2.08</b> | 0.0478   |
| TC04001501.hg.1           | <b>LINC01061</b>               | 25709.25                        | 13216.02                         | <b>1.94</b> | 0.0257   |
| TC05001269.hg.1           | <b>MIR580</b>                  | 77.17                           | 40.50                            | <b>1.91</b> | 0.0005   |
| TC15001206.hg.1           | <b>MIR3942</b>                 | 278.20                          | 151.17                           | <b>1.84</b> | 0.0293   |
| TC10000103.hg.1           | <b>LOC101928524</b>            | 304.44                          | 167.73                           | <b>1.81</b> | 0.0052   |
| TC12003271.hg.1           | <b>KLRC3</b>                   | 1458.23                         | 809.00                           | <b>1.8</b>  | 0.0433   |
| TC19000976.hg.1           | <b>LINC01002</b>               | 53602.03                        | 30152.71                         | <b>1.77</b> | 0.036    |
| TC19000978.hg.1           | <b>LOC730378</b>               | 211456.30                       | 121449.75                        | <b>1.75</b> | 0.0089   |
| TC17_ctg5_hap1000003.hg.1 | <b>ARL17A</b>                  | 1758.34                         | 1009.90                          | <b>1.74</b> | 0.0499   |
| TC05000981.hg.1           | <b>HRH2</b>                    | 1734.13                         | 1002.93                          | <b>1.74</b> | 0.0233   |
| TC04000209.hg.1           | <b>DTHD1</b>                   | 215.27                          | 124.50                           | <b>1.73</b> | 0.0326   |
| TC01002022.hg.1           | <b>OR2L1P</b>                  | 123.64                          | 71.51                            | <b>1.73</b> | 0.0179   |
| TC01000005.hg.1           | <b>LINC01001</b>               | 34397.12                        | 20452.65                         | <b>1.67</b> | 0.0283   |
| TC13000389.hg.1           | <b>LINC00676</b>               | 54.95                           | 33.13                            | <b>1.66</b> | 0.0229   |
| TC01002066.hg.1           | <b>LINC01001</b>               | 80684.28                        | 48644.87                         | <b>1.66</b> | 0.0297   |
| TC07003403.hg.1           | <b>LOC401320</b>               | 3082.75                         | 1858.60                          | <b>1.65</b> | 0.0099   |
| TC05003443.hg.1           | <b>LINC01001</b>               | 51418.50                        | 31433.17                         | <b>1.64</b> | 0.0416   |
| TC11003501.hg.1           | <b>LINC01001</b>               | 31433.17                        | 19215.73                         | <b>1.63</b> | 0.0363   |
| TC22000031.hg.1           | <b>LOC727983</b>               | 942.27                          | 580.04                           | <b>1.62</b> | 0.0224   |
| TC15001137.hg.1           | <b>CHRNA7</b>                  | 33.36                           | 20.68                            | <b>1.61</b> | 0.0201   |
| TC18000436.hg.1           | <b>DSC2</b>                    | 1520.15                         | 948.83                           | <b>1.61</b> | 0.0221   |
| TC07001003.hg.1           | <b>GIMAP7</b>                  | 4482.23                         | 2778.33                          | <b>1.61</b> | 0.0086   |

| ProbeID         | Gene Symbol                              | CHORIO<br>Group<br>Average<br>Expression | Control<br>Group<br>Average<br>Expression | Fold<br>Change | P-value |
|-----------------|------------------------------------------|------------------------------------------|-------------------------------------------|----------------|---------|
| TC10001324.hg.1 | <b>RTKN2</b>                             | 153.28                                   | 96.34                                     | <b>1.59</b>    | 0.0294  |
| TC09000265.hg.1 | <b>RP11-187C18.2</b>                     | 729.11                                   | 464.65                                    | <b>1.57</b>    | 0.0034  |
| TC0Y000014.hg.1 | <b>CD99</b>                              | 2646.74                                  | 1698.45                                   | <b>1.56</b>    | 0.0121  |
| TC02001750.hg.1 | <b>CYP1B1</b>                            | 448.82                                   | 288.01                                    | <b>1.56</b>    | 0.0394  |
| TC0X000014.hg.1 | <b>CD99</b>                              | 1520.15                                  | 975.50                                    | <b>1.55</b>    | 0.0102  |
| TC10000625.hg.1 | <b>PTEN</b>                              | 694.58                                   | 448.82                                    | <b>1.55</b>    | 0.0275  |
| TC07003404.hg.1 | <b>LOC401320</b>                         | 1296.13                                  | 843.36                                    | <b>1.54</b>    | 0.0266  |
| TC17001612.hg.1 | <b>ARL17B; ARL17A</b>                    | 2665.15                                  | 1746.20                                   | <b>1.53</b>    | 0.0215  |
| TC07003399.hg.1 | <b>GIMAP1-GIMAP5;<br/>GIMAP5; GIMAP1</b> | 989.12                                   | 648.07                                    | <b>1.53</b>    | 0.0155  |
| TC07001004.hg.1 | <b>GIMAP4</b>                            | 5595.30                                  | 3691.52                                   | <b>1.52</b>    | 0.0482  |
| TC12000873.hg.1 | <b>ADAM1A</b>                            | 487.75                                   | 324.03                                    | <b>1.51</b>    | 0.0085  |
| TC01004036.hg.1 | <b>LINC01347</b>                         | 28924.41                                 | 19215.73                                  | <b>1.51</b>    | 0.0473  |
| TC01000016.hg.1 | <b>LOC100287934</b>                      | 1209.34                                  | 803.41                                    | <b>1.51</b>    | 0.001   |
| TC11000314.hg.1 | <b>LINC00294</b>                         | 298.17                                   | 198.09                                    | <b>1.5</b>     | 0.0458  |
| TC02004349.hg.1 | <b>LOC105374809</b>                      | 229.13                                   | 74.03                                     | <b>3.08</b>    | 0.0077  |
| TC04002292.hg.1 | <b>LOC285505</b>                         | 385.34                                   | 135.30                                    | <b>2.84</b>    | 0.0083  |
| TC07002675.hg.1 | <b>GIMAP4</b>                            | 52498.92                                 | 23010.42                                  | <b>2.29</b>    | 0.0118  |
| TC19002275.hg.1 | <b>LINC01002</b>                         | 42642.37                                 | 21469.49                                  | <b>1.99</b>    | 0.0435  |
| TC15002743.hg.1 | <b>PRKXP1</b>                            | 30786.28                                 | 15608.02                                  | <b>1.98</b>    | 0.0245  |
| TC04002690.hg.1 | <b>LINC01061</b>                         | 12161.22                                 | 6888.62                                   | <b>1.77</b>    | 0.0129  |
| TC06003855.hg.1 | <b>VNN2</b>                              | 14164.58                                 | 8306.36                                   | <b>1.7</b>     | 0.007   |
| TC01005171.hg.1 | <b>OR2L1P</b>                            | 106.89                                   | 63.56                                     | <b>1.68</b>    | 0.0211  |
| TC11002977.hg.1 | <b>LINC01001</b>                         | 50360.33                                 | 30786.28                                  | <b>1.63</b>    | 0.0419  |
| TC04002162.hg.1 | <b>LOC729218</b>                         | 18561.17                                 | 11505.21                                  | <b>1.62</b>    | 0.0264  |
| TC07002674.hg.1 | <b>GIMAP7</b>                            | 4182.07                                  | 2610.30                                   | <b>1.6</b>     | 0.0263  |
| TC07002869.hg.1 | <b>LOC401320</b>                         | 1128.35                                  | 704.28                                    | <b>1.6</b>     | 0.0116  |
| TC10001807.hg.1 | <b>WDR37</b>                             | 1398.83                                  | 903.89                                    | <b>1.54</b>    | 0.0184  |
| TC12002570.hg.1 | <b>ADAM1A</b>                            | 451.94                                   | 296.11                                    | <b>1.53</b>    | 0.0034  |
| TC03002770.hg.1 | <b>LRCH3</b>                             | 809.00                                   | 530.06                                    | <b>1.53</b>    | 0.049   |
| TC01003858.hg.1 |                                          | 1458.23                                  | 205.07                                    | <b>7.1</b>     | 0.0331  |
| TC01003860.hg.1 |                                          | 21920.61                                 | 7332.05                                   | <b>2.99</b>    | 0.0013  |
| TC01003859.hg.1 |                                          | 5148.73                                  | 1758.34                                   | <b>2.93</b>    | 0.0058  |
| TC07000290.hg.1 |                                          | 5148.73                                  | 1758.34                                   | <b>2.93</b>    | 0.0058  |

| ProbeID         | Gene Symbol | CHORIO Group<br>Average<br>Expression | Control Group<br>Average<br>Expression | Fold<br>Change | P-value |
|-----------------|-------------|---------------------------------------|----------------------------------------|----------------|---------|
| TC07000368.hg.1 |             | 5148.73                               | 1758.34                                | <b>2.93</b>    | 0.0058  |
| TC04000607.hg.1 |             | 10085.54                              | 3541.14                                | <b>2.85</b>    | 0.0301  |
| TC07001400.hg.1 |             | 8599.28                               | 3104.19                                | <b>2.77</b>    | 0.0044  |
| TC01003861.hg.1 |             | 7231.10                               | 2628.46                                | <b>2.76</b>    | 0.0023  |
| TC01001880.hg.1 |             | 8902.53                               | 3258.52                                | <b>2.73</b>    | 0.0056  |
| TC07001379.hg.1 |             | 8902.53                               | 3258.52                                | <b>2.73</b>    | 0.0056  |
| TC07001411.hg.1 |             | 8902.53                               | 3258.52                                | <b>2.73</b>    | 0.0056  |
| TC07001421.hg.1 |             | 8902.53                               | 3258.52                                | <b>2.73</b>    | 0.0056  |
| TC05000308.hg.1 |             | 5220.60                               | 1924.14                                | <b>2.72</b>    | 0.0444  |
| TC05000320.hg.1 |             | 5220.60                               | 1924.14                                | <b>2.72</b>    | 0.0444  |
| TC05000486.hg.1 |             | 5220.60                               | 1924.14                                | <b>2.72</b>    | 0.0444  |
| TC05001199.hg.1 |             | 5220.60                               | 1924.14                                | <b>2.72</b>    | 0.0444  |
| TC05001633.hg.1 |             | 5220.60                               | 1924.14                                | <b>2.72</b>    | 0.0444  |
| TC20000159.hg.1 |             | 10369.08                              | 3848.29                                | <b>2.69</b>    | 0.0443  |
| TC01001878.hg.1 |             | 1652.00                               | 643.59                                 | <b>2.58</b>    | 0.0117  |
| TC07000366.hg.1 |             | 1652.00                               | 643.59                                 | <b>2.58</b>    | 0.0117  |
| TC07001381.hg.1 |             | 1652.00                               | 643.59                                 | <b>2.58</b>    | 0.0117  |
| TC07001402.hg.1 |             | 1652.00                               | 643.59                                 | <b>2.58</b>    | 0.0117  |
| TC07001412.hg.1 |             | 1652.00                               | 643.59                                 | <b>2.58</b>    | 0.0117  |
| TC07001423.hg.1 |             | 1652.00                               | 643.59                                 | <b>2.58</b>    | 0.0117  |
| TC01001879.hg.1 |             | 18305.63                              | 7181.15                                | <b>2.56</b>    | 0.0019  |
| TC07000289.hg.1 |             | 18305.63                              | 7181.15                                | <b>2.56</b>    | 0.0019  |
| TC07000367.hg.1 |             | 18305.63                              | 7181.15                                | <b>2.56</b>    | 0.0019  |
| TC07001380.hg.1 |             | 18305.63                              | 7181.15                                | <b>2.56</b>    | 0.0019  |
| TC07001422.hg.1 |             | 18305.63                              | 7181.15                                | <b>2.56</b>    | 0.0019  |
| TC04001593.hg.1 |             | 380.04                                | 149.09                                 | <b>2.54</b>    | 0.0317  |
| TC07000292.hg.1 |             | 3565.78                               | 1428.22                                | <b>2.51</b>    | 0.0213  |
| TC07000291.hg.1 |             | 2120.22                               | 873.10                                 | <b>2.43</b>    | 0.0059  |
| TC07001378.hg.1 |             | 2120.22                               | 873.10                                 | <b>2.43</b>    | 0.0059  |
| TC07001399.hg.1 |             | 2120.22                               | 873.10                                 | <b>2.43</b>    | 0.0059  |
| TC07001410.hg.1 |             | 2120.22                               | 873.10                                 | <b>2.43</b>    | 0.0059  |
| TC10000923.hg.1 |             | 533.74                                | 225.97                                 | <b>2.36</b>    | 0.0218  |
| TC07001401.hg.1 |             | 24833.50                              | 10734.74                               | <b>2.31</b>    | 0.0023  |

| ProbeID         | Gene Symbol | CHORIO Group Average Expression | Control Group Average Expression | Fold Change | P-value  |
|-----------------|-------------|---------------------------------|----------------------------------|-------------|----------|
| TC15001366.hg.1 |             | 52.35                           | 24.25                            | <b>2.16</b> | 0.005    |
| TC16001268.hg.1 |             | 8659.09                         | 4039.61                          | <b>2.14</b> | 0.0273   |
| TC01001881.hg.1 |             | 14362.31                        | 6984.79                          | <b>2.06</b> | 0.0427   |
| TC01003854.hg.1 |             | 14362.31                        | 6984.79                          | <b>2.06</b> | 0.0427   |
| TC0Y000089.hg.1 |             | 15935.98                        | 7912.95                          | <b>2.02</b> | 0.0427   |
| TC0Y000215.hg.1 |             | 15935.98                        | 7912.95                          | <b>2.02</b> | 0.0427   |
| TC0X001157.hg.1 |             | 2646.74                         | 1314.23                          | <b>2.02</b> | 0.0035   |
| TC10000182.hg.1 |             | 1541.37                         | 765.36                           | <b>2.02</b> | 0.0027   |
| TC04001681.hg.1 |             | 61.82                           | 31.34                            | <b>1.96</b> | 0.0033   |
| TC08000385.hg.1 |             | 26432.04                        | 13777.25                         | <b>1.91</b> | 0.0223   |
| TC01003997.hg.1 |             | 2225.63                         | 1168.14                          | <b>1.91</b> | 0.0358   |
| TC01001143.hg.1 |             | 74.54                           | 39.12                            | <b>1.9</b>  | 0.0385   |
| TC01003428.hg.1 |             | 74.54                           | 39.12                            | <b>1.9</b>  | 0.0385   |
| TC13000535.hg.1 |             | 74.54                           | 39.12                            | <b>1.9</b>  | 0.0385   |
| TC17001431.hg.1 |             | 74.54                           | 39.12                            | <b>1.9</b>  | 0.0385   |
| TC10000501.hg.1 |             | 20.68                           | 11.00                            | <b>1.88</b> | 9.89E-05 |
| TC04000892.hg.1 |             | 935.76                          | 494.56                           | <b>1.88</b> | 0.0329   |
| TC04001002.hg.1 |             | 155.42                          | 83.87                            | <b>1.86</b> | 0.0178   |
| TC21000099.hg.1 |             | 229.13                          | 124.50                           | <b>1.85</b> | 0.046    |
| TC17001365.hg.1 |             | 2998.45                         | 1675.06                          | <b>1.8</b>  | 0.0014   |
| TC10001099.hg.1 |             | 71.51                           | 40.22                            | <b>1.78</b> | 0.0305   |
| TC09000313.hg.1 |             | 54.57                           | 30.70                            | <b>1.78</b> | 0.0178   |
| TC12000053.hg.1 |             | 21.41                           | 12.13                            | <b>1.77</b> | 0.0098   |
| TC17001605.hg.1 |             | 1910.85                         | 1089.92                          | <b>1.76</b> | 0.0372   |
| TC19000979.hg.1 |             | 105728.15                       | 61572.56                         | <b>1.72</b> | 0.0209   |
| TC06001135.hg.1 |             | 666.29                          | 393.44                           | <b>1.7</b>  | 0.0341   |
| TC05000244.hg.1 |             | 2916.45                         | 1722.16                          | <b>1.69</b> | 0.0348   |
| TC12001370.hg.1 |             | 76.11                           | 45.25                            | <b>1.68</b> | 0.0105   |
| TC11001725.hg.1 |             | 104.69                          | 62.25                            | <b>1.68</b> | 0.0066   |
| TC01003098.hg.1 |             | 100.43                          | 60.13                            | <b>1.67</b> | 0.0065   |
| TC01003103.hg.1 |             | 100.43                          | 60.13                            | <b>1.67</b> | 0.0065   |
| TC19000267.hg.1 |             | 75.58                           | 44.94                            | <b>1.67</b> | 0.0008   |
| TC10000083.hg.1 |             | 2005.85                         | 1217.75                          | <b>1.65</b> | 0.011    |
| TC01001877.hg.1 |             | 128374.58                       | 78477.96                         | <b>1.63</b> | 0.02     |

| ProbeID                  | Gene Symbol | CHORIO<br>Group<br>Average<br>Expression | Control<br>Group<br>Average<br>Expression | Fold<br>Change | P-value  |
|--------------------------|-------------|------------------------------------------|-------------------------------------------|----------------|----------|
| TC01003862.hg.1          |             | 128374.58                                | 78477.96                                  | <b>1.63</b>    | 0.02     |
| TC06001206.hg.1          |             | 128374.58                                | 78477.96                                  | <b>1.63</b>    | 0.02     |
| TC07000287.hg.1          |             | 128374.58                                | 78477.96                                  | <b>1.63</b>    | 0.02     |
| TC07001403.hg.1          |             | 128374.58                                | 78477.96                                  | <b>1.63</b>    | 0.02     |
| TC07001413.hg.1          |             | 128374.58                                | 78477.96                                  | <b>1.63</b>    | 0.02     |
| TCUn_gl000227000001.hg.1 |             | 128374.58                                | 78477.96                                  | <b>1.63</b>    | 0.02     |
| TC06000434.hg.1          |             | 39.67                                    | 24.76                                     | <b>1.6</b>     | 0.0004   |
| TC11000334.hg.1          |             | 8422.31                                  | 5330.30                                   | <b>1.59</b>    | 0.0167   |
| TC17000111.hg.1          |             | 94.35                                    | 60.13                                     | <b>1.58</b>    | 0.0133   |
| TC07000365.hg.1          |             | 35857.82                                 | 22851.48                                  | <b>1.58</b>    | 0.0215   |
| TC07001382.hg.1          |             | 35857.82                                 | 22851.48                                  | <b>1.58</b>    | 0.0215   |
| TC07001424.hg.1          |             | 35857.82                                 | 22851.48                                  | <b>1.58</b>    | 0.0215   |
| TC05001349.hg.1          |             | 240.52                                   | 154.34                                    | <b>1.56</b>    | 0.0353   |
| TC15001432.hg.1          |             | 103.97                                   | 67.18                                     | <b>1.55</b>    | 0.0314   |
| TC01001404.hg.1          |             | 51.63                                    | 33.59                                     | <b>1.54</b>    | 0.0227   |
| TC01002198.hg.1          |             | 93.70                                    | 60.97                                     | <b>1.54</b>    | 0.0039   |
| TC01001840.hg.1          |             | 2368.90                                  | 1562.89                                   | <b>1.52</b>    | 0.0148   |
| TC10000525.hg.1          |             | 25.81                                    | 16.91                                     | <b>1.52</b>    | 0.0254   |
| TC05002421.hg.1          |             | 1924.14                                  | 820.30                                    | <b>2.35</b>    | 0.0024   |
| TC07002898.hg.1          |             | 349.71                                   | 152.22                                    | <b>2.3</b>     | 1.66E-06 |
| TC05002667.hg.1          |             | 522.76                                   | 250.73                                    | <b>2.08</b>    | 0.0082   |
| TC21000653.hg.1          |             | 257.78                                   | 128.00                                    | <b>2.01</b>    | 0.0354   |
| TC07002667.hg.1          |             | 99.04                                    | 49.18                                     | <b>2.01</b>    | 0.0401   |
| TC07002607.hg.1          |             | 171.25                                   | 86.82                                     | <b>1.97</b>    | 0.0026   |
| TC17002302.hg.1          |             | 209.38                                   | 112.21                                    | <b>1.88</b>    | 0.0277   |
| TC17002671.hg.1          |             | 1845.76                                  | 982.29                                    | <b>1.87</b>    | 0.044    |
| TC10002194.hg.1          |             | 867.07                                   | 471.14                                    | <b>1.84</b>    | 0.0058   |
| TC01004101.hg.1          |             | 113316.62                                | 63303.60                                  | <b>1.79</b>    | 0.0157   |
| TC04002413.hg.1          |             | 182.28                                   | 102.54                                    | <b>1.78</b>    | 0.045    |
| TC06002765.hg.1          |             | 147.03                                   | 83.87                                     | <b>1.76</b>    | 0.0012   |
| TC0X002129.hg.1          |             | 3795.30                                  | 2164.77                                   | <b>1.74</b>    | 0.0008   |
| TC17002157.hg.1          |             | 151.17                                   | 88.03                                     | <b>1.72</b>    | 0.0306   |
| TC04002164.hg.1          |             | 44146.15                                 | 25709.25                                  | <b>1.71</b>    | 0.0202   |
| TC01005080.hg.1          |             | 1082.39                                  | 643.59                                    | <b>1.69</b>    | 0.0147   |

| ProbeID         | Gene Symbol | CHORIO<br>Group<br>Average<br>Expression | Control<br>Group<br>Average<br>Expression | Fold<br>Change | P-value |
|-----------------|-------------|------------------------------------------|-------------------------------------------|----------------|---------|
| TC04002324.hg.1 |             | 44.32                                    | 26.35                                     | <b>1.69</b>    | 0.0432  |
| TC13001493.hg.1 |             | 38.85                                    | 22.94                                     | <b>1.69</b>    | 0.0002  |
| TC04002163.hg.1 |             | 5832.91                                  | 3468.27                                   | <b>1.68</b>    | 0.0206  |
| TC04002143.hg.1 |             | 326.29                                   | 195.36                                    | <b>1.68</b>    | 0.0067  |
| TC01006114.hg.1 |             | 121.94                                   | 74.03                                     | <b>1.65</b>    | 0.0164  |
| TC07002897.hg.1 |             | 106.15                                   | 65.34                                     | <b>1.63</b>    | 0.0002  |
| TC02004043.hg.1 |             | 210.84                                   | 129.79                                    | <b>1.63</b>    | 0.0282  |
| TC10002017.hg.1 |             | 16270.83                                 | 10015.87                                  | <b>1.63</b>    | 0.0223  |
| TC01006151.hg.1 |             | 34159.52                                 | 21321.18                                  | <b>1.61</b>    | 0.0389  |
| TC20001566.hg.1 |             | 873.10                                   | 541.19                                    | <b>1.61</b>    | 0.0124  |
| TC01004694.hg.1 |             | 1105.13                                  | 699.41                                    | <b>1.59</b>    | 0.0396  |
| TC01004960.hg.1 |             | 179.77                                   | 114.56                                    | <b>1.58</b>    | 0.0148  |
| TC01004838.hg.1 |             | 317.37                                   | 200.85                                    | <b>1.58</b>    | 0.0192  |
| TC01006140.hg.1 |             | 25709.25                                 | 16384.00                                  | <b>1.57</b>    | 0.0187  |
| TC14001804.hg.1 |             | 290.02                                   | 184.82                                    | <b>1.57</b>    | 0.0178  |
| TC18000918.hg.1 |             | 233.94                                   | 149.09                                    | <b>1.57</b>    | 0.0039  |
| TC09001978.hg.1 |             | 210.84                                   | 136.24                                    | <b>1.55</b>    | 0.0158  |
| TC17002484.hg.1 |             | 167.73                                   | 108.38                                    | <b>1.55</b>    | 0.0293  |
| TC17002059.hg.1 |             | 165.42                                   | 106.15                                    | <b>1.55</b>    | 0.0079  |
| TC10001946.hg.1 |             | 1031.12                                  | 670.92                                    | <b>1.54</b>    | 0.0039  |
| TC06003586.hg.1 |             | 26.35                                    | 17.15                                     | <b>1.54</b>    | 0.0272  |
| TC07003176.hg.1 |             | 266.87                                   | 173.65                                    | <b>1.54</b>    | 0.0087  |
| TC09002409.hg.1 |             | 461.44                                   | 298.17                                    | <b>1.54</b>    | 0.0101  |
| TC15002562.hg.1 |             | 132.51                                   | 86.82                                     | <b>1.53</b>    | 0.0277  |
| TC16001990.hg.1 |             | 1251.98                                  | 820.30                                    | <b>1.53</b>    | 0.0254  |
| TC13001186.hg.1 |             | 218.27                                   | 143.01                                    | <b>1.53</b>    | 0.0465  |
| TC01005193.hg.1 |             | 68794.23                                 | 44762.41                                  | <b>1.53</b>    | 0.0318  |
| TC01005474.hg.1 |             | 270.60                                   | 178.53                                    | <b>1.52</b>    | 0.0238  |
| TC07002294.hg.1 |             | 1438.15                                  | 942.27                                    | <b>1.52</b>    | 0.0181  |
| TC10001901.hg.1 |             | 2241.11                                  | 1468.37                                   | <b>1.52</b>    | 0.0123  |
| TC17002234.hg.1 |             | 588.13                                   | 390.72                                    | <b>1.51</b>    | 0.0073  |
| TC12002436.hg.1 |             | 41.07                                    | 27.10                                     | <b>1.51</b>    | 0.0002  |
| TC07002647.hg.1 |             | 182.28                                   | 121.10                                    | <b>1.51</b>    | 0.0276  |

**Table 2: Differentially downregulated probeID or genes after exposure to histological chorioamnionitis:**

| ProbeID         | Gene Symbol    | CHORIO Group Average Expression | Control Group Average Expression | Fold Change   | P-value |
|-----------------|----------------|---------------------------------|----------------------------------|---------------|---------|
| TC01003638.hg.1 | PTGS2          | 252.48                          | 9089.59                          | <b>-35.91</b> | 0.0205  |
| TC04002953.hg.1 | AREG           | 313.00                          | 1884.54                          | <b>-6.03</b>  | 0.001   |
| TC04002952.hg.1 | AREG           | 328.56                          | 1897.65                          | <b>-5.75</b>  | 0.0009  |
| TC01001749.hg.1 | G0S2           | 2352.53                         | 13034.07                         | <b>-5.54</b>  | 0.008   |
| TC05001854.hg.1 | HBEGF          | 385.34                          | 2005.85                          | <b>-5.18</b>  | 0.0022  |
| TC19001593.hg.1 | PLAUR          | 1448.15                         | 7082.29                          | <b>-4.89</b>  | 0.0138  |
| TC21001069.hg.1 | SAMSN1         | 3956.48                         | 17438.64                         | <b>-4.42</b>  | 0.0257  |
| TC12001216.hg.1 | OLR1           | 178.53                          | 765.36                           | <b>-4.27</b>  | 0.0365  |
| TC03000276.hg.1 | CAMP           | 657.11                          | 2683.69                          | <b>-4.09</b>  | 0.0011  |
| TC09000508.hg.1 | NR4A3          | 143.01                          | 580.04                           | <b>-4.07</b>  | 0.0128  |
| TC03001357.hg.1 | LTF            | 2683.69                         | 9345.14                          | <b>-3.49</b>  | 0.0208  |
| TC03002133.hg.1 | ATP13A3        | 1618.00                         | 5634.22                          | <b>-3.47</b>  | 0.0063  |
| TC10000566.hg.1 | PPIF           | 1152.06                         | 3541.14                          | <b>-3.09</b>  | 0.0226  |
| TC10000629.hg.1 | LIPN           | 519.15                          | 1584.71                          | <b>-3.05</b>  | 0.0234  |
| TC09001325.hg.1 | NFIL3          | 1192.69                         | 3304.00                          | <b>-2.77</b>  | 0.0262  |
| TC05001589.hg.1 | LUCAT1         | 265.03                          | 729.11                           | <b>-2.75</b>  | 0.0057  |
| TC01003629.hg.1 | IVNS1ABP       | 8422.31                         | 21469.49                         | <b>-2.55</b>  | 0.0036  |
| TC01001622.hg.1 | RGS1           | 1428.22                         | 3541.14                          | <b>-2.47</b>  | 0.0042  |
| TC17000117.hg.1 | KDM6B          | 1200.98                         | 2916.45                          | <b>-2.42</b>  | 0.0318  |
| TC19000885.hg.1 | FCAR           | 2256.70                         | 5330.30                          | <b>-2.35</b>  | 0.0023  |
| TC01000733.hg.1 | PDE4B          | 280.14                          | 652.58                           | <b>-2.33</b>  | 0.0125  |
| TC19001241.hg.1 | ADGRE3         | 680.29                          | 1573.76                          | <b>-2.3</b>   | 0.042   |
| TC06000844.hg.1 | PRDM1          | 263.20                          | 600.49                           | <b>-2.28</b>  | 0.006   |
| TC0X000079.hg.1 | SYAP1          | 968.76                          | 2164.77                          | <b>-2.22</b>  | 0.0013  |
| TC02002102.hg.1 | DUSP2          | 474.41                          | 1031.12                          | <b>-2.18</b>  | 0.0153  |
| TC03001302.hg.1 | CSRNP1         | 617.37                          | 1287.18                          | <b>-2.09</b>  | 0.0268  |
| TC0X000112.hg.1 | SAT1           | 13873.08                        | 28924.41                         | <b>-2.08</b>  | 0.0162  |
| TC03000766.hg.1 | ATP1B3         | 2288.20                         | 4705.07                          | <b>-2.06</b>  | 0.0363  |
| TC04000411.hg.1 | CXCL1          | 112.21                          | 229.13                           | <b>-2.05</b>  | 0.0404  |
| TC19001830.hg.1 | TARM1          | 116.16                          | 235.57                           | <b>-2.02</b>  | 0.0059  |
| TC17000983.hg.1 | MIR22HG; MIR22 | 410.15                          | 826.00                           | <b>-2.01</b>  | 0.0006  |
| TC12000414.hg.1 | NR4A1          | 144.01                          | 288.01                           | <b>-2.01</b>  | 0.0174  |
| TC22000648.hg.1 | OSM            | 68.12                           | 134.36                           | <b>-1.97</b>  | 0.0458  |



| ProbeID         | Gene Symbol              | CHORIO<br>Group<br>Average<br>Expression | Control<br>Group<br>Average<br>Expression | Fold<br>Change | P-value |
|-----------------|--------------------------|------------------------------------------|-------------------------------------------|----------------|---------|
| TC05001385.hg.1 | PLK2                     | 95.01                                    | 187.40                                    | <b>-1.97</b>   | 0.0396  |
| TC15002005.hg.1 | CHSY1                    | 1686.71                                  | 3304.00                                   | <b>-1.96</b>   | 0.0039  |
| TC10000922.hg.1 | PTPRE                    | 4329.55                                  | 8364.13                                   | <b>-1.93</b>   | 0.0206  |
| TC20000395.hg.1 | SNAI1                    | 47.18                                    | 91.14                                     | <b>-1.93</b>   | 0.0083  |
| TC06002120.hg.1 | VNN3                     | 604.67                                   | 1168.14                                   | <b>-1.93</b>   | 0.039   |
| TC20000844.hg.1 | MAFB                     | 207.94                                   | 398.93                                    | <b>-1.92</b>   | 0.0097  |
| TC05001628.hg.1 | CHD1                     | 8023.41                                  | 15286.81                                  | <b>-1.9</b>    | 0.0413  |
| TC01000950.hg.1 | AMPD2                    | 670.92                                   | 1269.46                                   | <b>-1.89</b>   | 0.0104  |
| TC10000189.hg.1 | MASTL                    | 335.46                                   | 634.73                                    | <b>-1.89</b>   | 0.0091  |
| TC07003301.hg.1 | PNPLA8                   | 1820.35                                  | 3326.99                                   | <b>-1.83</b>   | 0.007   |
| TC19001457.hg.1 | NFKBID                   | 261.38                                   | 471.14                                    | <b>-1.81</b>   | 0.0095  |
| TC01003359.hg.1 | ETV3                     | 1152.06                                  | 2076.59                                   | <b>-1.8</b>    | 0.0099  |
| TC22001424.hg.1 | APOBEC3A_B; APOBEC3A     | 2149.82                                  | 3821.70                                   | <b>-1.77</b>   | 0.0451  |
| TC19000812.hg.1 | ZNF331                   | 288.01                                   | 512.00                                    | <b>-1.77</b>   | 0.0308  |
| TC01000474.hg.1 | ZC3H12A                  | 256.00                                   | 451.94                                    | <b>-1.76</b>   | 0.0422  |
| TC17000141.hg.1 | NDEL1                    | 3350.13                                  | 5873.48                                   | <b>-1.75</b>   | 0.0038  |
| TC04000678.hg.1 | NOCT                     | 205.07                                   | 362.04                                    | <b>-1.75</b>   | 0.008   |
| TC14000694.hg.1 | SNORD114-17              | 50.21                                    | 88.03                                     | <b>-1.75</b>   | 0.0121  |
| TC06001498.hg.1 | TRIM10                   | 116.16                                   | 203.66                                    | <b>-1.75</b>   | 0.0443  |
| TC19000274.hg.1 | CYP4F3                   | 202.25                                   | 352.14                                    | <b>-1.74</b>   | 0.0449  |
| TC03000056.hg.1 | IRAK2                    | 164.28                                   | 284.05                                    | <b>-1.74</b>   | 0.048   |
| TC10000413.hg.1 | DDX21                    | 7486.11                                  | 12854.63                                  | <b>-1.71</b>   | 0.036   |
| TC21000506.hg.1 | SIK1                     | 968.76                                   | 1652.00                                   | <b>-1.7</b>    | 0.0182  |
| TC05001570.hg.1 | CCNH                     | 2665.15                                  | 4451.27                                   | <b>-1.68</b>   | 0.0061  |
| TC05001610.hg.1 | ELL2                     | 709.18                                   | 1192.69                                   | <b>-1.68</b>   | 0.0165  |
| TC07001738.hg.1 | NAMPT                    | 67378.47                                 | 110984.60                                 | <b>-1.65</b>   | 0.0367  |
| TC15000111.hg.1 | SNORD115-42; SNORD115-10 | 91.14                                    | 151.17                                    | <b>-1.65</b>   | 0.0175  |
| TC09000274.hg.1 | CNTNAP3B                 | 40.79                                    | 66.72                                     | <b>-1.63</b>   | 0.026   |
| TC02000183.hg.1 | FOSL2                    | 837.53                                   | 1370.04                                   | <b>-1.63</b>   | 0.0317  |
| TC15000080.hg.1 | SNORD115-6               | 108.38                                   | 176.07                                    | <b>-1.63</b>   | 0.0198  |
| TC07001304.hg.1 | FAM183BP                 | 116.97                                   | 187.40                                    | <b>-1.6</b>    | 0.0145  |
| TC03000096.hg.1 | EAF1                     | 1128.35                                  | 1807.78                                   | <b>-1.59</b>   | 0.0257  |
| TC19001351.hg.1 | LOC105372321             | 77.71                                    | 124.50                                    | <b>-1.59</b>   | 0.014   |
| TC06001762.hg.1 | NFKBIE                   | 413.00                                   | 657.11                                    | <b>-1.59</b>   | 0.0351  |

| ProbeID         | Gene Symbol | CHORIO<br>Group<br>Average<br>Expression | Control<br>Group<br>Average<br>Expression | Fold<br>Change | P-value |
|-----------------|-------------|------------------------------------------|-------------------------------------------|----------------|---------|
| TC01001720.hg.1 | CTSE        | 121.94                                   | 191.34                                    | <b>-1.57</b>   | 0.0366  |
| TC05001831.hg.1 | ETF1        | 2288.20                                  | 3590.58                                   | <b>-1.57</b>   | 0.0124  |
| TC17001118.hg.1 | MYH10       | 77.71                                    | 121.94                                    | <b>-1.57</b>   | 0.0407  |
| TC07003328.hg.1 | RABGEF1     | 1530.73                                  | 2418.67                                   | <b>-1.57</b>   | 0.0019  |
| TC04001570.hg.1 | SLC7A11     | 57.68                                    | 91.14                                     | <b>-1.57</b>   | 0.0048  |
| TC06000532.hg.1 | CDKN1A      | 385.34                                   | 596.34                                    | <b>-1.55</b>   | 0.0076  |
| TC17000108.hg.1 | ATP1B2      | 50.56                                    | 78.25                                     | <b>-1.54</b>   | 0.0383  |
| TC0X000238.hg.1 | TIMP1       | 413.00                                   | 634.73                                    | <b>-1.54</b>   | 0.0184  |
| TC17000119.hg.1 | CYB5D1      | 88.65                                    | 135.30                                    | <b>-1.53</b>   | 0.0471  |
| TC16001302.hg.1 | MPHOSPH6    | 418.77                                   | 634.73                                    | <b>-1.51</b>   | 0.0039  |
| TC19001640.hg.1 | PGLYRP1     | 321.80                                   | 484.38                                    | <b>-1.51</b>   | 0.0324  |
| TC15000093.hg.1 | SNORD115-21 | 47.84                                    | 72.00                                     | <b>-1.51</b>   | 0.0156  |
| TC01004998.hg.1 | G0S2        | 4608.24                                  | 50012.46                                  | <b>-10.82</b>  | 0.0054  |
| TC07003113.hg.1 | DOCK4       | 564.18                                   | 4240.45                                   | <b>-7.51</b>   | 0.0092  |
| TC06003603.hg.1 | HLA-DQB1    | 315.17                                   | 2272.40                                   | <b>-7.18</b>   | 0.0089  |
| TC02004133.hg.1 | BRE-AS1     | 149.09                                   | 975.50                                    | <b>-6.55</b>   | 0.036   |
| TC19002226.hg.1 | ZNF331      | 268.73                                   | 1060.11                                   | <b>-3.94</b>   | 0.023   |
| TC19002237.hg.1 | FCAR        | 8135.41                                  | 26801.01                                  | <b>-3.3</b>    | 0.0076  |
| TC11003025.hg.1 | BGLT3       | 78.79                                    | 240.52                                    | <b>-3.06</b>   | 0.0237  |
| TC12002776.hg.1 | ART4        | 30.06                                    | 73.52                                     | <b>-2.45</b>   | 0.0061  |
| TC06003854.hg.1 | VNN3        | 935.76                                   | 2288.20                                   | <b>-2.45</b>   | 0.0214  |
| TC17002479.hg.1 | MYH10       | 71.01                                    | 164.28                                    | <b>-2.33</b>   | 0.0408  |
| TC08002253.hg.1 | EGR3        | 37.79                                    | 85.04                                     | <b>-2.25</b>   | 0.0131  |
| TC0X001608.hg.1 | SYAP1       | 2272.40                                  | 5077.84                                   | <b>-2.24</b>   | 0.0004  |
| TC17002040.hg.1 | ATP1B2      | 108.38                                   | 227.54                                    | <b>-2.1</b>    | 0.0467  |
| TC17002437.hg.1 | MIR22HG     | 530.06                                   | 1089.92                                   | <b>-2.05</b>   | 0.0004  |
| TC0X001624.hg.1 | SAT1        | 38698.77                                 | 77397.54                                  | <b>-1.99</b>   | 0.009   |
| TC12002493.hg.1 | DUSP6       | 59.30                                    | 112.21                                    | <b>-1.9</b>    | 0.0392  |
| TC02004331.hg.1 | ADD2        | 195.36                                   | 359.54                                    | <b>-1.84</b>   | 0.0194  |
| TC08002252.hg.1 | LOC286058   | 37.79                                    | 67.18                                     | <b>-1.78</b>   | 0.0019  |
| TC07002236.hg.1 | AQP1        | 68.59                                    | 118.60                                    | <b>-1.73</b>   | 0.0229  |
| TC10002105.hg.1 | DDX21       | 6338.83                                  | 11036.54                                  | <b>-1.73</b>   | 0.0387  |
| TC05003160.hg.1 | CHD1        | 16384.00                                 | 27554.49                                  | <b>-1.68</b>   | 0.0075  |
| TC08002257.hg.1 | TNFRSF10B   | 604.67                                   | 996.00                                    | <b>-1.64</b>   | 0.0481  |

| ProbeID         | Gene Symbol   | CHORIO<br>Group<br>Average<br>Expression | Control<br>Group<br>Average<br>Expression | Fold<br>Change | P-value |
|-----------------|---------------|------------------------------------------|-------------------------------------------|----------------|---------|
| TC08002367.hg.1 | <b>PTTG3P</b> | 53.82                                    | 86.82                                     | <b>-1.61</b>   | 0.0219  |
| TC01004453.hg.1 | <b>IL23R</b>  | 45.25                                    | 69.55                                     | <b>-1.53</b>   | 0.032   |
| TC09001882.hg.1 | <b>UBAP1</b>  | 4544.80                                  | 6936.54                                   | <b>-1.52</b>   | 0.0238  |
| TC17002039.hg.1 | <b>ATP1B2</b> | 82.71                                    | 124.50                                    | <b>-1.5</b>    | 0.0204  |
| TC0X001292.hg.1 |               | 233.94                                   | 643.59                                    | <b>-2.76</b>   | 0.0152  |
| TC10001182.hg.1 |               | 9410.14                                  | 20738.16                                  | <b>-2.2</b>    | 0.0137  |
| TC12000140.hg.1 |               | 568.10                                   | 1226.22                                   | <b>-2.16</b>   | 0.0493  |
| TC03000057.hg.1 |               | 461.44                                   | 867.07                                    | <b>-1.89</b>   | 0.0313  |
| TC02000821.hg.1 |               | 11.63                                    | 20.97                                     | <b>-1.8</b>    | 0.018   |
| TC02000833.hg.1 |               | 11.63                                    | 20.97                                     | <b>-1.8</b>    | 0.018   |
| TC02000835.hg.1 |               | 11.63                                    | 20.97                                     | <b>-1.8</b>    | 0.018   |
| TC02002302.hg.1 |               | 11.63                                    | 20.97                                     | <b>-1.8</b>    | 0.018   |
| TC02002305.hg.1 |               | 11.63                                    | 20.97                                     | <b>-1.8</b>    | 0.018   |
| TC02002315.hg.1 |               | 11.63                                    | 20.97                                     | <b>-1.8</b>    | 0.018   |
| TC02002316.hg.1 |               | 11.63                                    | 20.97                                     | <b>-1.8</b>    | 0.018   |
| TC02002337.hg.1 |               | 11.63                                    | 20.97                                     | <b>-1.8</b>    | 0.018   |
| TC14000014.hg.1 |               | 11.63                                    | 20.97                                     | <b>-1.8</b>    | 0.018   |
| TC14000020.hg.1 |               | 11.63                                    | 20.97                                     | <b>-1.8</b>    | 0.018   |
| TC14000024.hg.1 |               | 11.63                                    | 20.97                                     | <b>-1.8</b>    | 0.018   |
| TC14000860.hg.1 |               | 11.63                                    | 20.97                                     | <b>-1.8</b>    | 0.018   |
| TC14000863.hg.1 |               | 11.63                                    | 20.97                                     | <b>-1.8</b>    | 0.018   |
| TC14000866.hg.1 |               | 11.63                                    | 20.97                                     | <b>-1.8</b>    | 0.018   |
| TC15001030.hg.1 |               | 11.63                                    | 20.97                                     | <b>-1.8</b>    | 0.018   |
| TC18000390.hg.1 |               | 11.63                                    | 20.97                                     | <b>-1.8</b>    | 0.018   |
| TC21000020.hg.1 |               | 11.63                                    | 20.97                                     | <b>-1.8</b>    | 0.018   |
| TC22000442.hg.1 |               | 11.63                                    | 20.97                                     | <b>-1.8</b>    | 0.018   |
| TC22000445.hg.1 |               | 11.63                                    | 20.97                                     | <b>-1.8</b>    | 0.018   |
| TC22000450.hg.1 |               | 11.63                                    | 20.97                                     | <b>-1.8</b>    | 0.018   |
| TC10000551.hg.1 |               | 210.84                                   | 367.09                                    | <b>-1.74</b>   | 0.005   |
| TC15001956.hg.1 |               | 24.25                                    | 41.93                                     | <b>-1.72</b>   | 0.044   |
| TC06000878.hg.1 |               | 28.25                                    | 48.50                                     | <b>-1.71</b>   | 0.0492  |
| TC06001629.hg.1 |               | 29.45                                    | 50.21                                     | <b>-1.7</b>    | 0.0203  |
| TC11000068.hg.1 |               | 39.12                                    | 65.80                                     | <b>-1.68</b>   | 0.0028  |
| TC06001641.hg.1 |               | 14.72                                    | 24.76                                     | <b>-1.67</b>   | 0.0087  |

| ProbeID         | Gene Symbol | CHORIO<br>Group<br>Average<br>Expression | Control<br>Group<br>Average<br>Expression | Fold<br>Change | P-value |
|-----------------|-------------|------------------------------------------|-------------------------------------------|----------------|---------|
| TC10000827.hg.1 |             | 138.14                                   | 229.13                                    | <b>-1.67</b>   | 0.0385  |
| TC0Y000099.hg.1 |             | 19.70                                    | 32.00                                     | <b>-1.62</b>   | 0.0472  |
| TC0Y000204.hg.1 |             | 19.70                                    | 32.00                                     | <b>-1.62</b>   | 0.0472  |
| TC11000813.hg.1 |             | 160.90                                   | 259.57                                    | <b>-1.61</b>   | 0.0417  |
| TC10000130.hg.1 |             | 191.34                                   | 306.55                                    | <b>-1.6</b>    | 0.0054  |
| TC11001759.hg.1 |             | 179.77                                   | 284.05                                    | <b>-1.57</b>   | 0.0358  |
| TC14000432.hg.1 |             | 621.67                                   | 975.50                                    | <b>-1.57</b>   | 0.0321  |
| TC06001181.hg.1 |             | 20.68                                    | 32.00                                     | <b>-1.55</b>   | 0.0005  |
| TC15000546.hg.1 |             | 18.38                                    | 28.44                                     | <b>-1.54</b>   | 0.0149  |
| TC07000685.hg.1 |             | 37.27                                    | 56.89                                     | <b>-1.53</b>   | 0.0341  |
| TC17001909.hg.1 |             | 86.22                                    | 131.60                                    | <b>-1.52</b>   | 0.0433  |
| TC14000637.hg.1 |             | 74.03                                    | 112.21                                    | <b>-1.52</b>   | 0.0492  |
| TC19000183.hg.1 |             | 3169.41                                  | 4770.75                                   | <b>-1.51</b>   | 0.0478  |
| TC06001872.hg.1 |             | 129.79                                   | 195.36                                    | <b>-1.51</b>   | 0.0275  |
| TC05001712.hg.1 |             | 12.38                                    | 18.64                                     | <b>-1.51</b>   | 0.0069  |
| TC01002961.hg.1 |             | 229.13                                   | 344.89                                    | <b>-1.5</b>    | 0.0322  |
| TC03003282.hg.1 |             | 393.44                                   | 2241.11                                   | <b>-5.7</b>    | 0.0038  |
| TC05003141.hg.1 |             | 218.27                                   | 634.73                                    | <b>-2.91</b>   | 0.0051  |
| TC11002782.hg.1 |             | 108.38                                   | 225.97                                    | <b>-2.09</b>   | 0.0112  |
| TC20001155.hg.1 |             | 43.41                                    | 88.03                                     | <b>-2.03</b>   | 0.0185  |
| TC13001355.hg.1 |             | 45702.96                                 | 85877.94                                  | <b>-1.87</b>   | 0.023   |
| TC06003961.hg.1 |             | 14.62                                    | 26.91                                     | <b>-1.85</b>   | 0.0371  |
| TC09001960.hg.1 |             | 27.10                                    | 48.84                                     | <b>-1.8</b>    | 0.0057  |
| TC0X001908.hg.1 |             | 32995.92                                 | 58656.36                                  | <b>-1.78</b>   | 0.0301  |
| TC14002072.hg.1 |             | 71.01                                    | 122.79                                    | <b>-1.73</b>   | 0.0078  |
| TC13000992.hg.1 |             | 24.25                                    | 39.67                                     | <b>-1.64</b>   | 0.0006  |
| TC21000824.hg.1 |             | 19.70                                    | 31.34                                     | <b>-1.6</b>    | 0.0069  |
| TC01005996.hg.1 |             | 533.74                                   | 849.22                                    | <b>-1.59</b>   | 0.0245  |
| TC09002600.hg.1 |             | 45.89                                    | 73.01                                     | <b>-1.59</b>   | 0.01    |
| TC05002657.hg.1 |             | 64.00                                    | 100.43                                    | <b>-1.57</b>   | 0.034   |
| TC15002185.hg.1 |             | 49.87                                    | 77.71                                     | <b>-1.56</b>   | 0.0208  |
| TC09001920.hg.1 |             | 56.49                                    | 87.43                                     | <b>-1.55</b>   | 0.0274  |
| TC21000612.hg.1 |             | 23.10                                    | 35.51                                     | <b>-1.53</b>   | 0.0075  |
